# Supplementary material for: Extra virgin coconut oil (Cocos nucifera L.) intake shows neurobehavioural and intestinal health effects in obesity-induced rats
Source: Royal Society of Chemistry journal article supplement (doi:10.1039/d3fo00850a), 2023-01-01
Supplement: d3fo00850a1.pdf [file d3fo00850a1.pdf]

## Extra virgin coconut oil (*Cocos nucifera* L.) intake shows neurobehavioural and intestinal health effects in obesity-induced rats

### Supplementary material

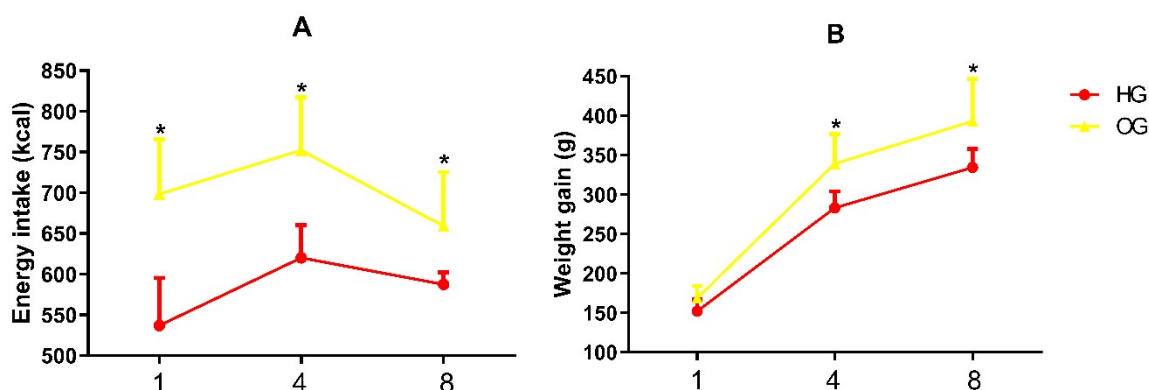

Fig. S1 (A) Energy intake and (B) weight gain in healthy and obese rats during the pre-treatment period with E-VCO. Data presented as mean and standard deviation of the mean. Two-way ANOVA,  $p \leq 0.05$  Tukey's post hoc test. \*Differed from HG. HG= healthy group; OG = obese group.

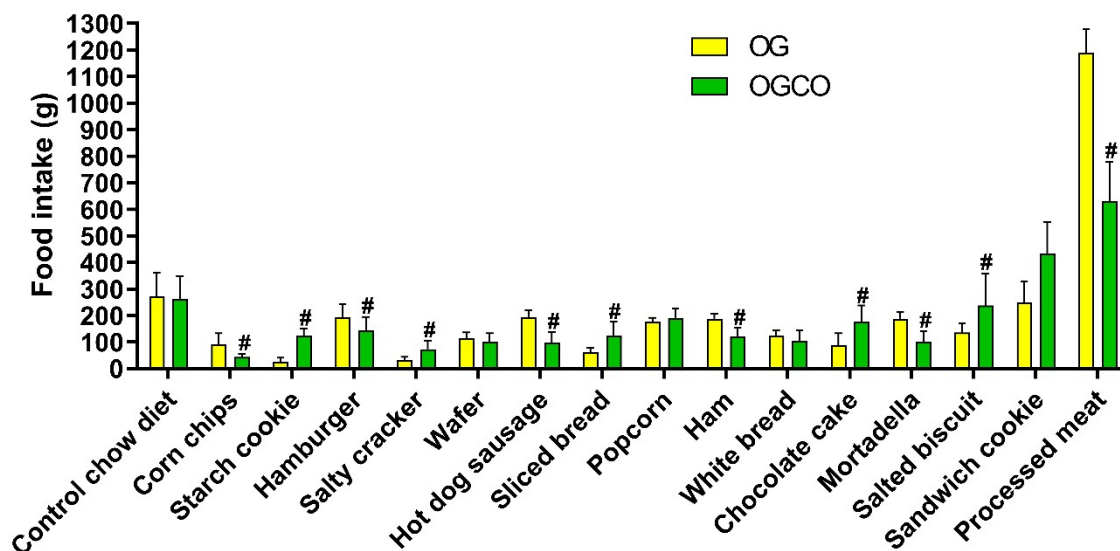

Fig. S2 Food preference of obese rats treated or not with E-VCO. One Way ANOVA,  $p \leq 0.05$  Tukey's post hoc test. # Differed from OG. OG = obese group; OGCO = obese group treated with extra-virgin coconut oil.

**Table S1.** Fatty acids and phenolic profile quantified in extra virgin coconut oil (E-VCO) (Vasconcelos et al., 2022)

| Fatty acids (%)                                                          | Extra virgin coconut oil (Mean $\pm$ SD) |
|--------------------------------------------------------------------------|------------------------------------------|
| Caproic acid C 6:0                                                       | 1.91 $\pm$ 0.1                           |
| Caprylic acid C 8:0                                                      | 46.92 $\pm$ 0.89                         |
| Capric acid C 10:0                                                       | 39.71 $\pm$ 0.71                         |
| Lauric acid C12:0                                                        | 5.74 $\pm$ 0.12                          |
| Miristic acid C 14:0                                                     | 1.93 $\pm$ 0.05                          |
| Palmitic acid C16:0                                                      | 1.06 $\pm$ 0.05                          |
| Stearic acid C18:0                                                       | 0.32 $\pm$ 0.06                          |
| Arachidic acid C20:0                                                     | N.d.                                     |
| Total saturated fatty acids (SFA %)                                      | 97.59 $\pm$ 1.98                         |
| Myristoleic acid C14:1 n5c                                               | 0.15 $\pm$ 0.01                          |
| Palmitoleic acid C16:1 n7                                                | 0.09 $\pm$ 0.01                          |
| Oleic acid C18:1 n9c                                                     | 1.83 $\pm$ 0.1                           |
| Vaccenic acid C18:1 n11                                                  | 0.01 $\pm$ 0.01                          |
| Gadoleic acid C20:1 n9                                                   | 0.02 $\pm$ 0.01                          |
| Total monounsaturated fatty acids (MUFA %)                               | 2.1 $\pm$ 0.14                           |
| Linoleic acid C18:2 n6 c ( $\omega$ 6)                                   | 0.31 $\pm$ 0.01                          |
| Total polyunsaturated fatty acids (PUFA %)                               | 0.31 $\pm$ 0.01                          |
| Total medium chain fatty acids – MCFA (C <sub>6</sub> -C <sub>12</sub> ) | 94.28                                    |
| Total long chain fatty acids - LCFA (C <sub>14</sub> -C <sub>24</sub> )  | 5.72                                     |
| Phenolic compounds (mg/100 g)                                            | Extra virgin coconut oil (Mean $\pm$ SD) |
| Flavanol                                                                 |                                          |
| Catechin                                                                 | 1.06 $\pm$ 0.15                          |
| Flavanone                                                                |                                          |
| Naringenin                                                               | 0.64 $\pm$ 0.05                          |
| Flavonol                                                                 |                                          |
| Kampferol                                                                | 0.59 $\pm$ 0.03                          |
| Myricetin                                                                | 2.29 $\pm$ 0.08                          |
| Quercetin                                                                | 3.35 $\pm$ 0.08                          |
| Rutin                                                                    | 8.99 $\pm$ 0.53                          |
| Total flavonoids                                                         | 16.92                                    |
| Hydroxybenzoic acids                                                     |                                          |
| 3,4-dihydroxybenzoic acid                                                | 4.79 $\pm$ 0.03                          |
| 4-hydroxybenzoic acid                                                    | 1.06 $\pm$ 0.01                          |
| Ellagic acid                                                             | 1.22 $\pm$ 0.02                          |
| Salicylic acid                                                           | 3.83 $\pm$ 0.03                          |
| Vanillic acid                                                            | 1.28 $\pm$ 0.05                          |
| Hydroxycinnamic acids                                                    |                                          |
| Trans-cinnamic acid                                                      | 0.59 $\pm$ 0.03                          |
| Caffeic acid                                                             | 2.45 $\pm$ 0.01                          |
| p-coumaric acid                                                          | 3.19 $\pm$ 0.02                          |
| Synapic acid                                                             | 1.91 $\pm$ 0.09                          |
| Total non-flavonoids                                                     | 20.32                                    |
| Total phenolic compounds                                                 | 37.24                                    |

SD = standard deviation of the mean; MUFA = Total monounsaturated fatty acids; PUFA = Total polyunsaturated fatty acids; MCFA = Total medium chain fatty acids; LCFA = Total long chain fatty acids.

**Table S2.** Nutritional composition of foods offered in cafeteria diet to the obese group (OG) and obese group treated with E-VCO (OGCO) (Tavares et al., 2021).

| Foods offered     | Value per 100 g of food |          |          |         |         |           |             |
|-------------------|-------------------------|----------|----------|---------|---------|-----------|-------------|
|                   | kcal                    | Carb (g) | Prot (g) | Fat (g) | SFA (g) | Fibre (g) | Sodium (mg) |
| Corn chips        | 504.00                  | 60.00    | 7.60     | 23.20   | 5.20    | 536.00    | 1,072.00    |
| Starch cookie     | 426.66                  | 70.00    | 5.00     | 11.66   | 2.33    | 2.00      | 186.66      |
| Hamburger         | 281.25                  | 3.75     | 18.75    | 21.87   | 6.37    | 1.62      | 581.25      |
| Salty cracker     | 446.67                  | 66.67    | 10.67    | 15.33   | 6.33    | 0.00      | 580.00      |
| Wafer             | 540.00                  | 63.33    | 5.00     | 29.66   | 15.33   | 0.00      | 133.33      |
| Hot dog sausage   | 413.33                  | 0.00     | 24.33    | 26.66   | 8.33    | 1.20      | 1,787.00    |
| Sliced bread      | 1,020.00                | 48.00    | 7.60     | 2.60    | 0.60    | 2.60      | 384.00      |
| Popcorn           | 400.00                  | 91.11    | 6.66     | 0.66    | 0.00    | 0.00      | 0.00        |
| Ham               | 93.33                   | 2.00     | 14.66    | 3.00    | 21.00   | 0.00      | 1,100.00    |
| White bread       | 352.00                  | 72.00    | 8.40     | 2.80    | 1.60    | 1.60      | 600.00      |
| Chocolate cake    | 345.00                  | 50.00    | 4.25     | 14.25   | 4.00    | 0.00      | 190.00      |
| Bologna           | 311.00                  | 3.05     | 16.37    | 25.39   | 9.51    | 0.00      | 1,246.00    |
| Salted biscuit    | 488.88                  | 62.22    | 5.77     | 24.44   | 9.77    | 2.64      | 688.88      |
| Sandwich biscuit  | 396.66                  | 53.33    | 6.33     | 17.66   | 7.33    | 2.66      | 263.33      |
| Processed meat    | 195.00                  | 10.00    | 12.00    | 12.00   | 6.00    | 0.00      | 982.50      |
| Control chow diet | 320.00                  | 75.80    | 27.35    | 28.77   | 0.00    | 0.00      | 0.001       |
| Total             | 6,533.78                | 731.26   | 180.74   | 259.95  | 103.70  | 550.32    | 9,794.95    |

kcal = calories; Carb = carbohydrates; Prot = proteins; SFA = saturated fatty acids.

**Table S3.** Nutritional composition of the control and cafeteria diets.

| Composition           | Diets   |           |
|-----------------------|---------|-----------|
|                       | Control | Cafeteria |
| Energy value (kcal/g) | 3.1     | 4.1       |
| Carbohydrate (kcal %) | 57      | 48        |
| Protein (kcal %)      | 28      | 14        |
| Total fat (kcal %)    | 15      | 38        |

kcal = calories; g = grams
